# Supplementary material
Source: Royal Society of Chemistry journal article supplement (doi:10.1039/d6tb00369a)

## **Supporting Information**

### ***Fluorescent Boron and Phosphorus Co-Doped Graphene Quantum Dots for Bovine Serum Albumin Sensing in Cow's Milk with Smartphone-Enabled Real-Time Readout***

Khajuria Deepika Amirchand<sup>a+</sup>, Himanshu Kumar<sup>b,c+</sup>, Sakthivel Kogularasu<sup>b,c,d</sup>, Guo-Ping Chang-Chien<sup>b,c,d</sup>, Bo-Wun Huang<sup>e</sup>, Ming-Chun Ma<sup>f,g\*</sup>, Wan-Ching Lin<sup>h,i\*</sup>

<sup>a</sup> *Department of Chemical Engineering, Indian Institute of Technology, Madras 600036, Chennai, India*

<sup>b</sup> *Super Micro Mass Research and Technology Center, Cheng Shiu University, Kaohsiung 833301, Taiwan.*

<sup>c</sup> *Center for Environmental Toxin and Emerging-Contaminant Research, Cheng Shiu University, Kaohsiung 833301, Taiwan.*

<sup>d</sup> *Institute of Environmental Toxin and Emerging Contaminant, Cheng Shiu University, Kaohsiung, 833301, Taiwan*

<sup>e</sup> *Department of Mechanical Engineering, Cheng Shiu University, Kaohsiung 833301, Taiwan*

<sup>f</sup> *Division of Hemato-oncology, Department of Internal Medicine, Kaohsiung Chang-Gung Memorial Hospital, Kaohsiung 83301, Taiwan.*

<sup>g</sup> *Department of Electrical Engineering, Cheng Shiu University, Kaohsiung 833301, Taiwan.*

<sup>h</sup> *Department of Neuroradiology, E-da Hospital, I-Shou University, Kaohsiung 84001, Taiwan*

<sup>i</sup> *Department of Neurosurgery, E-Da Hospital/I-Shou University, Kaohsiung, 84001, Taiwan*

<sup>+</sup> Authors contributed equally.

\*Corresponding authors: M-C Ma ([mingchung@cgmh.org.tw](mailto:mingchung@cgmh.org.tw)); W-C Lin ([ed109840@edah.org.tw](mailto:ed109840@edah.org.tw))

### S1. Calculation for the limit of detection (LOD)

The LOD can be estimated by Equation (1)

$$\text{LOD} = \frac{3S}{K} \quad (1)$$

where S is the standard deviation of five measurements of blank samples and K is the quenching constant

### S2. Photoluminescence quantum yield (PLQY)

$$Q_y = Q_R \left( \frac{m_s}{m_r} \right) \left( \frac{n_s}{n_r} \right)^2$$

Q = Fluorescence quantum yield

n = Refractive index of the solvent

A = Absorbance of the solution

E = Integrated fluorescence intensity of the emitted light

Subscripts 'r' and 's' refer to the reference and unknown fluorophore respectively

$$Q_y = 0.51 \times \frac{5.9 \times 10^8}{8.4 \times 10^8} \quad (S2)$$

$$Q_y = 0.358$$

$$\text{PLQ}_y = 35.8\%$$

**Fig S3-a. Optimized and HOMO BSA**

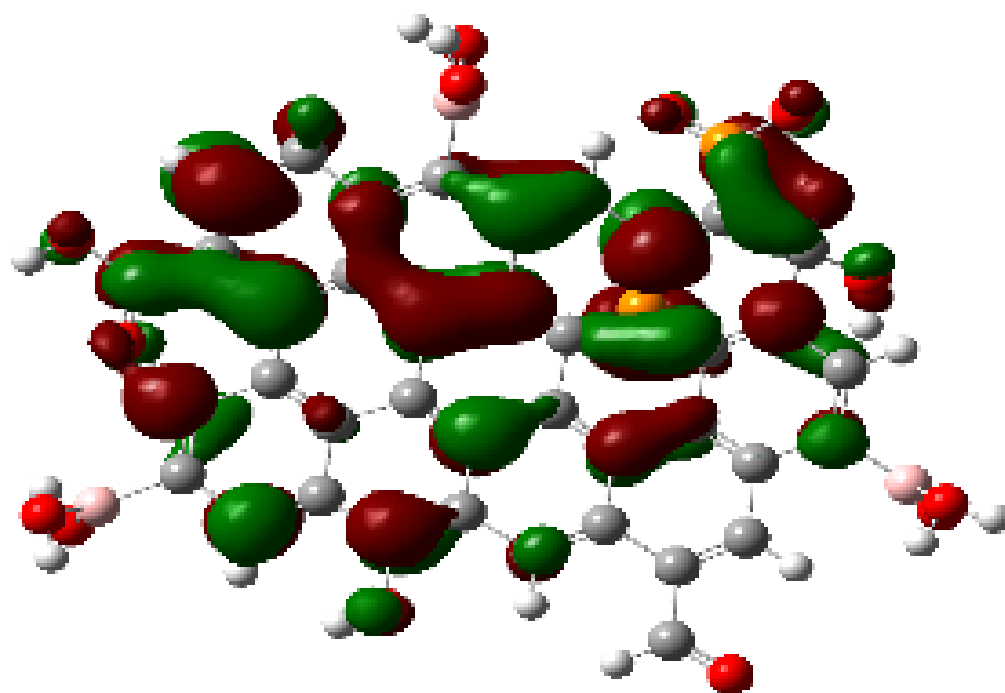

**Fig S3-b. Optimized and LOMO BSA**

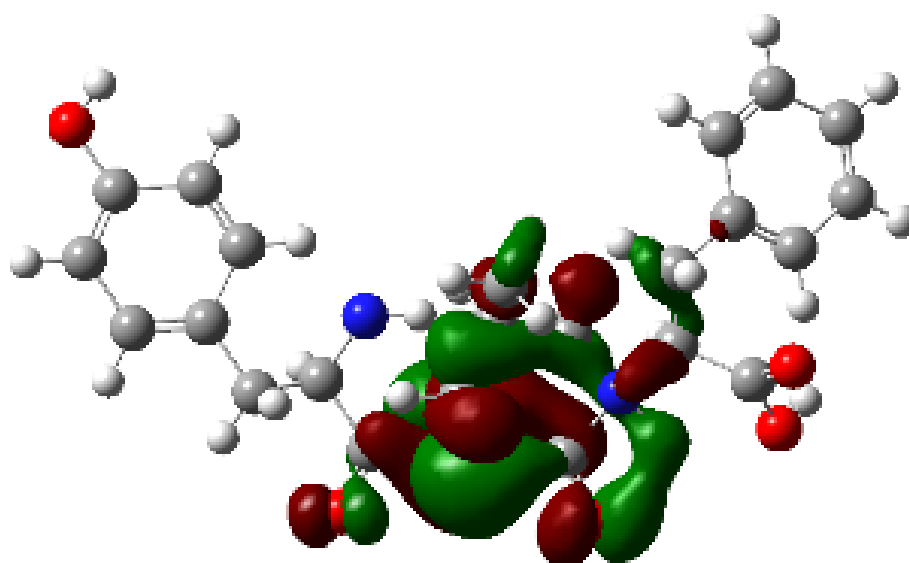

**Fig S4-a. Optimized and HOMO BPGQDs**

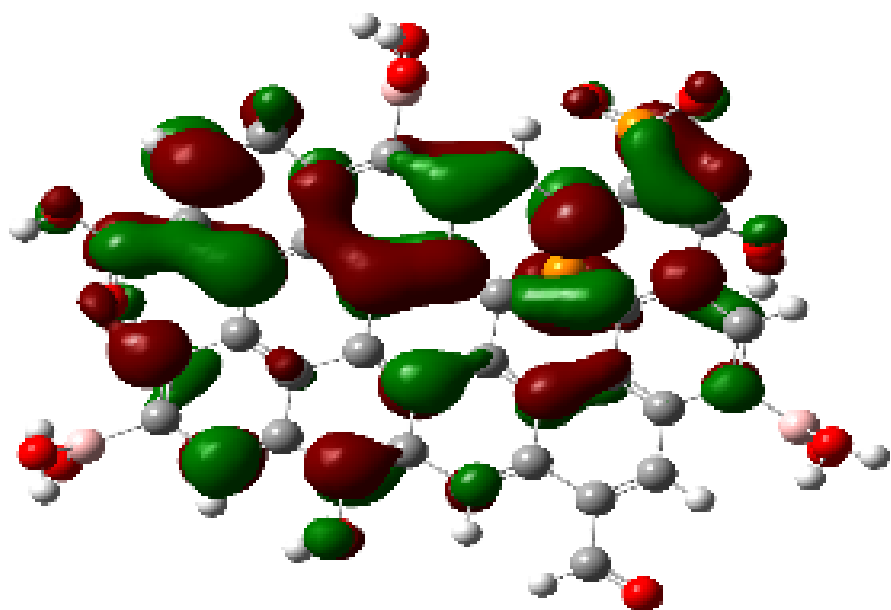

**Fig S4-b. Optimized and LOMO BPGQDs**

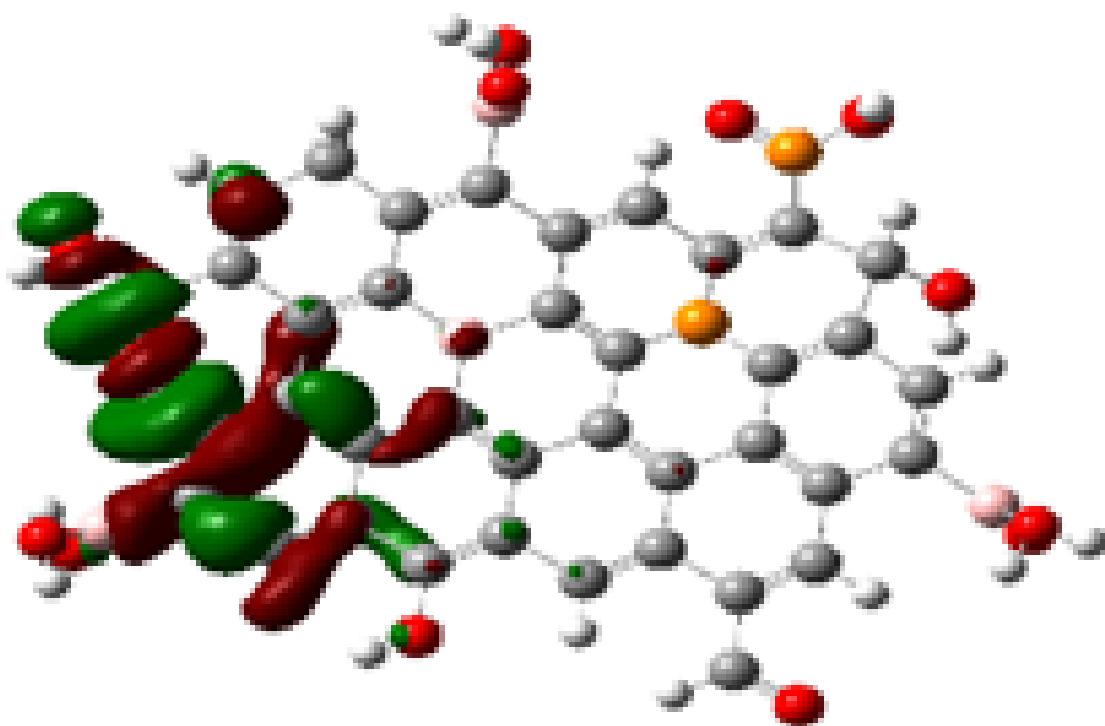

Supplement: d6tb00369a1.pdf [file d6tb00369a1.pdf]
